# Supplementary material for: Activation/Inhibition of Gene Expression Caused by Alcohols: Relationship with the Viscoelastic Property of a DNA Molecule
Source: MDPI journal article supplement (doi:10.3390/polym15010149), 2022-12-28
Supplement: s1 [file s1]

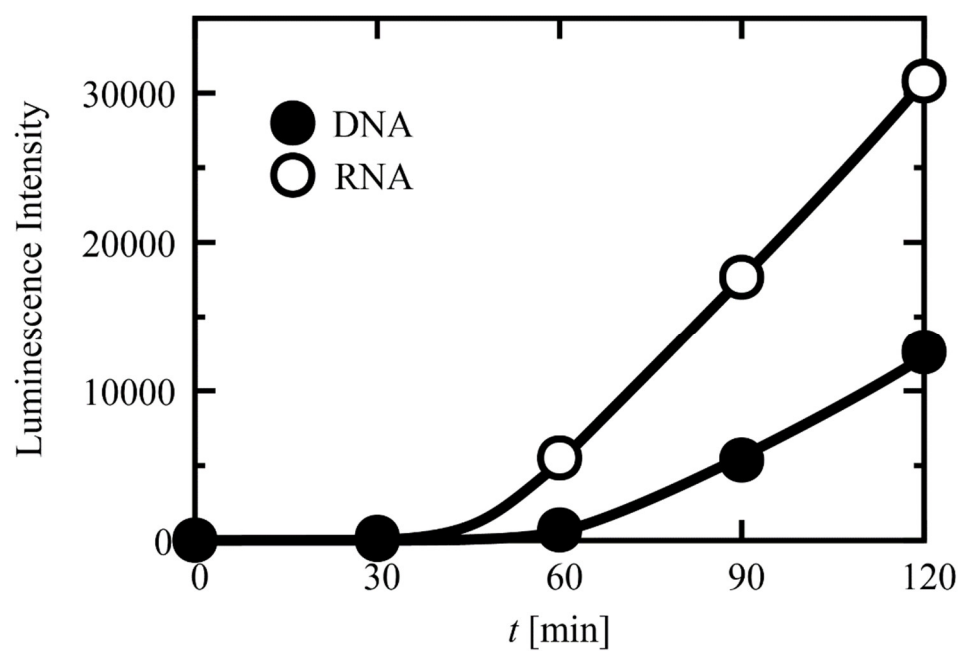

**Figure S1.** Time-dependent (0–120 minutes) increase in gene expression using the DNA or RNA templates and read as a change in luminescence. The efficiency of gene expression corresponded to the luminescence intensity. The concentrations of DNA and RNA were fixed at 0.3  $\mu\text{M}$ .

**Table S1.** Detailed experimental data on the efficiency of (a) gene expression (TX-TL) and (b) translation (TL) at different alcohol concentrations of ethanol, 1-propanol and 2-propanol.

|                              |         |         |         |                              |         |         |          |                              |         |         |         |
|------------------------------|---------|---------|---------|------------------------------|---------|---------|----------|------------------------------|---------|---------|---------|
| <b>(a)</b>                   |         |         |         |                              |         |         |          |                              |         |         |         |
| <b>Ethanol</b>               |         |         |         | <b>1-Propanol</b>            |         |         |          | <b>2-Propanol</b>            |         |         |         |
| Luminescence Intensity [RLU] |         |         |         | Luminescence Intensity [RLU] |         |         |          | Luminescence Intensity [RLU] |         |         |         |
| Concentration [%]            | 1st run | 2nd run | Average | Concentration [%]            | 1st run | 2nd run | Average  | Concentration [%]            | 1st run | 2nd run | Average |
| 0                            | 8049    | 8549    | 8299    | 0                            | 110560  | 120507  | 115533.5 | 0                            | 8979    | 9394    | 9186.5  |
| 1                            | 21747   | 21873   | 21810   | 1                            | 74762   | 73458   | 74110    | 1                            | 26987   | 28569   | 27778   |
| 2                            | 37904   | 39140   | 38522   | 2                            | 31909   | 31313   | 31611    | 2                            | 38385   | 40768   | 39576.5 |
| 3                            | 43486   | 43490   | 43488   | 3                            | 8666    | 9076    | 8871     | 3                            | 23044   | 23718   | 23381   |
| 4                            | 22614   | 22809   | 22711.5 | 4                            | 859     | 953     | 906      | 4                            | 13854   | 13724   | 13789   |
| 7                            | 1147    | 1160    | 1153.5  | 7                            | 24      | 16      | 20       | 7                            | 160     | 166     | 163     |
| 10                           | 39      | 42      | 40.5    | 10                           | 12      | 17      | 14.5     | 10                           | 34      | 22      | 28      |
| Luminescence Intensity [RLU] |         |         |         | Luminescence Intensity [RLU] |         |         |          | Luminescence Intensity [RLU] |         |         |         |
| Concentration [%]            | 1st run | 2nd run | Average | Concentration [%]            | 1st run | 2nd run | Average  | Concentration [%]            | 1st run | 2nd run | Average |
| 0                            | 10514   | 11336   | 10925   | 0                            | 20562   | 22756   | 21659    | 0                            | 6533    | 6659    | 6596    |
| 1                            | 30668   | 32601   | 31634.5 | 1                            | 12594   | 14130   | 13362    | 1                            | 20540   | 20336   | 20438   |
| 2                            | 33698   | 36211   | 34954.5 | 2                            | 5892    | 5947    | 5919.5   | 2                            | 26817   | 27049   | 26933   |
| 3                            | 34279   | 36464   | 35371.5 | 3                            | 1719    | 1683    | 1701     | 3                            | 15453   | 15286   | 15369.5 |
| 4                            | 19474   | 19857   | 19665.5 | 4                            | 149     | 137     | 143      | 4                            | 5710    | 5859    | 5784.5  |
| 7                            | 651     | 678     | 664.5   | 7                            | 12      | 22      | 17       | 7                            | 102     | 103     | 102.5   |
| 10                           | 29      | 23      | 26      | 10                           | 21      | 29      | 25       | 10                           | 18      | 28      | 23      |
| Luminescence Intensity [RLU] |         |         |         | Luminescence Intensity [RLU] |         |         |          | Luminescence Intensity [RLU] |         |         |         |
| Concentration [%]            | 1st run | 2nd run | Average | Concentration [%]            | 1st run | 2nd run | Average  | Concentration [%]            | 1st run | 2nd run | Average |
| 0                            | 10425   | 10455   | 10440   | 0                            | 17008   | 19309   | 18158.5  | 0                            | 7098    | 7258    | 7178    |
| 1                            | 26144   | 26689   | 26416.5 | 1                            | 12263   | 12585   | 12424    | 1                            | 15528   | 15614   | 15571   |
| 2                            | 44316   | 45626   | 44971   | 2                            | 5223    | 5208    | 5215.5   | 2                            | 19966   | 20706   | 20336   |
| 3                            | 50026   | 51841   | 50933.5 | 3                            | 1144    | 1199    | 1171.5   | 3                            | 11032   | 11208   | 11120   |
| 4                            | 27687   | 27102   | 27394.5 | 4                            | 101     | 156     | 128.5    | 4                            | 5018    | 5132    | 5075    |
| 7                            | 1025    | 1105    | 1065    | 7                            | 30      | 16      | 23       | 7                            | 48      | 43      | 45.5    |
| 10                           | 16      | 20      | 18      | 10                           | 19      | 25      | 22       | 10                           | 20      | 10      | 15      |

  

|                              |         |         |          |                              |         |         |         |                              |         |         |          |
|------------------------------|---------|---------|----------|------------------------------|---------|---------|---------|------------------------------|---------|---------|----------|
| <b>(b)</b>                   |         |         |          |                              |         |         |         |                              |         |         |          |
| <b>Ethanol</b>               |         |         |          | <b>1-Propanol</b>            |         |         |         | <b>2-Propanol</b>            |         |         |          |
| Luminescence Intensity [RLU] |         |         |          | Luminescence Intensity [RLU] |         |         |         | Luminescence Intensity [RLU] |         |         |          |
| Concentration [%]            | 1st run | 2nd run | Average  | Concentration [%]            | 1st run | 2nd run | Average | Concentration [%]            | 1st run | 2nd run | Average  |
| 0                            | 17523   | 17758   | 17640.5  | 0                            | 8420    | 8935    | 8677.5  | 0                            | 9297    | 10884   | 10090.5  |
| 1                            | 66358   | 67697   | 67027.5  | 1                            | 14889   | 15949   | 15419   | 1                            | 29340   | 29659   | 29499.5  |
| 2                            | 92001   | 94895   | 93448    | 2                            | 18249   | 19370   | 18809.5 | 2                            | 40324   | 40776   | 40550    |
| 3                            | 97418   | 98969   | 98193.5  | 3                            | 13974   | 14517   | 14245.5 | 3                            | 32423   | 32944   | 32683.5  |
| 4                            | 73504   | 74440   | 73972    | 4                            | 3475    | 3971    | 3723    | 4                            | 30672   | 32089   | 31380.5  |
| 7                            | 23580   | 23494   | 23537    | 7                            | 65      | 69      | 67      | 7                            | 6634    | 6517    | 6575.5   |
| 10                           | 1083    | 1086    | 1084.5   | 10                           | 21      | 23      | 22      | 10                           | 1422    | 1427    | 1424.5   |
| Luminescence Intensity [RLU] |         |         |          | Luminescence Intensity [RLU] |         |         |         | Luminescence Intensity [RLU] |         |         |          |
| Concentration [%]            | 1st run | 2nd run | Average  | Concentration [%]            | 1st run | 2nd run | Average | Concentration [%]            | 1st run | 2nd run | Average  |
| 0                            | 16493   | 16638   | 16565.5  | 0                            | 14123   | 14506   | 14314.5 | 0                            | 18453   | 19614   | 19033.5  |
| 1                            | 79813   | 78915   | 79364    | 1                            | 24325   | 25284   | 24804.5 | 1                            | 75496   | 77749   | 76622.5  |
| 2                            | 136612  | 141735  | 139173.5 | 2                            | 28616   | 29935   | 29275.5 | 2                            | 113465  | 117746  | 115605.5 |
| 3                            | 135683  | 140475  | 138079   | 3                            | 20877   | 20978   | 20927.5 | 3                            | 99726   | 99308   | 99517    |
| 4                            | 106499  | 107010  | 106754.5 | 4                            | 4645    | 5151    | 4898    | 4                            | 95122   | 96102   | 95612    |
| 7                            | 34569   | 36945   | 35757    | 7                            | 52      | 40      | 46      | 7                            | 21966   | 22323   | 22144.5  |
| 10                           | 633     | 650     | 641.5    | 10                           | 39      | 27      | 33      | 10                           | 7528    | 7421    | 7474.5   |
| Luminescence Intensity [RLU] |         |         |          | Luminescence Intensity [RLU] |         |         |         | Luminescence Intensity [RLU] |         |         |          |
| Concentration [%]            | 1st run | 2nd run | Average  | Concentration [%]            | 1st run | 2nd run | Average | Concentration [%]            | 1st run | 2nd run | Average  |
| 0                            | 17996   | 18695   | 18345.5  | 0                            | 17120   | 18415   | 17767.5 | 0                            | 17120   | 18415   | 17767.5  |
| 1                            | 71875   | 73600   | 72737.5  | 1                            | 73687   | 73502   | 73594.5 | 1                            | 73687   | 73502   | 73594.5  |
| 2                            | 97802   | 98278   | 98040    | 2                            | 98587   | 97449   | 98018   | 2                            | 98587   | 97449   | 98018    |
| 3                            | 106098  | 109357  | 107727.5 | 3                            | 81650   | 83825   | 82737.5 | 3                            | 81650   | 83825   | 82737.5  |
| 4                            | 91281   | 92685   | 91983    | 4                            | 65643   | 65507   | 65575   | 4                            | 65643   | 65507   | 65575    |
| 7                            | 16529   | 21498   | 19013.5  | 7                            | 13444   | 14371   | 13907.5 | 7                            | 13444   | 14371   | 13907.5  |
| 10                           | 7108    | 7278    | 7193     | 10                           | 1222    | 1309    | 1265.5  | 10                           | 1222    | 1309    | 1265.5   |

### Additional explanation of Table S1:

We measured the expression level of luciferase by detecting the emission at around 565 nm using a luminometer (MICROTEC Co., Chiba, Japan) after the addition of luciferase substrate (Luciferase Assay Reagent, Promega). Following the manufacturer's instructions, we measured the intensity of luminescence in units of RLU (relative light unit) as an apparent strength of luminescence represented with a luminometer. Then, we evaluated the gene expression efficiency in relative luminescence intensity based on the control condition, which is without adding any alcohols, as shown in Figure 1. Table A1 shows the whole data of measured RLU as raw data of gene expression experiments shown in Figure 1. Both gene expression experiments, TX-TL (Figure 1a) and TL (Figure 1b), were carried out in duplicate runs and independently replicated three times, i.e., we obtained 6 data points for each condition.

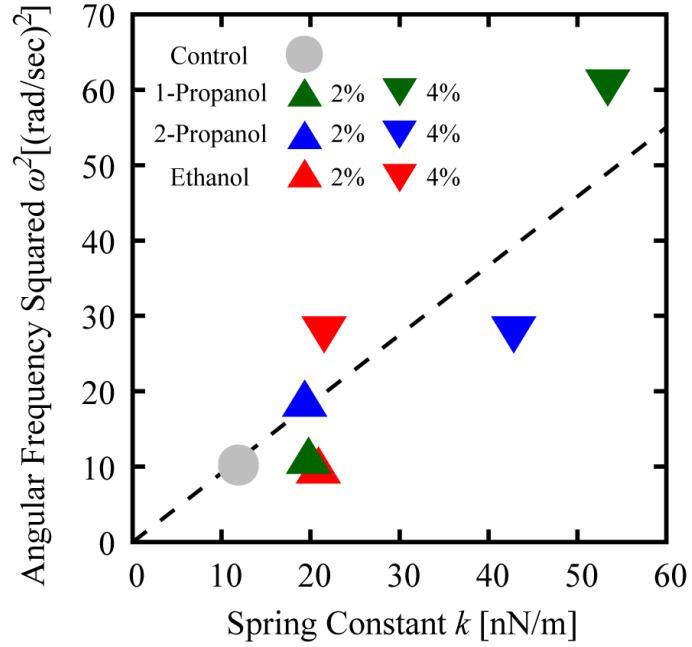

**Figure S2.** The relationship between  $k$  and  $\omega^2$ . According to the theoretical framework on fluctuation-dissipation,  $k \propto \omega^2$  is derived as the fundamental relationship. The dashed line indicates regression estimated by the least-squares method based on the plots for each condition.

**Table S2.** Viscoelastic parameters evaluated from the analysis of the intrachain fluctuation on single T4 GT7 DNA molecules.

|               | C(0) [ $\mu\text{m}^2$ ] | Spring constant<br>$k$ [ $\times 10^{-9}\text{Nm}^{-1}$ ] | Damping constant<br>$\gamma$ [ $\text{sec}^{-1}$ ] | Angular frequency<br>$\omega$ [ $\text{rad sec}^{-1}$ ] | Damping ratio *<br>$\zeta$ |
|---------------|--------------------------|-----------------------------------------------------------|----------------------------------------------------|---------------------------------------------------------|----------------------------|
| Control       | $0.35 \pm 0.02$          | $12 \pm 0.7$                                              | $0.9 \pm 0.2$                                      | $3.2 \pm 0.2$                                           | $0.27 \pm 0.07$            |
| Ethanol       | $0.20 \pm 0.03$          | $21 \pm 3.2$                                              | $1.1 \pm 0.2$                                      | $3.1 \pm 0.2$                                           | $0.33 \pm 0.07$            |
| 2% 1-Propanol | $0.21 \pm 0.03$          | $20 \pm 2.8$                                              | $1.3 \pm 0.1$                                      | $3.3 \pm 0.3$                                           | $0.37 \pm 0.04$            |
| 2-Propanol    | $0.21 \pm 0.03$          | $19 \pm 2.8$                                              | $1.2 \pm 0.1$                                      | $4.3 \pm 0.3$                                           | $0.27 \pm 0.03$            |
| Ethanol       | $0.19 \pm 0.02$          | $22 \pm 2.3$                                              | $1.6 \pm 0.1$                                      | $5.3 \pm 0.5$                                           | $0.29 \pm 0.03$            |
| 4% 1-Propanol | $0.08 \pm 0.01$          | $53 \pm 6.6$                                              | $3.0 \pm 0.4$                                      | $7.8 \pm 1.0$                                           | $0.36 \pm 0.07$            |
| 2-Propanol    | $0.10 \pm 0.01$          | $43 \pm 4.2$                                              | $1.5 \pm 0.2$                                      | $5.3 \pm 0.6$                                           | $0.27 \pm 0.05$            |

$$* \quad \zeta = \frac{\gamma}{\sqrt{\gamma^2 + \omega^2}}$$
